# Supplementary material for: Evaluation of mitochondrial biogenesis and ROS generation in high-grade serous ovarian cancer
Source: Frontiers journal article supplement (doi:10.3389/fonc.2023.1129352), 2023-03-01
Supplement: Data_Sheet_2.PDF [file Data_Sheet_2.PDF]

## SUPPLEMENTAL TABLES

**Table S1.** The Tumor Characteristics of Ovarian Carcinoma Biopsies. Fifteen de-identified ovarian tumors and normal tissue biopsies were removed by surgical excision from patients treated at the Marshall University Edwards Comprehensive Cancer Center, Huntington, WV. Ovarian cancer subtypes were determined by immunohistochemistry, immunofluorescence, and fluorescence in situ hybridization techniques by the Edwards Comprehensive Cancer Center.

| Patient # | BMI   | Stage    | Diagnosis                   |
|-----------|-------|----------|-----------------------------|
| 1         | 39.1  | pT2cN0   | High grade serous carcinoma |
| 2         | 27.1  | pT1NX    | High grade serous carcinoma |
| 3         | 26.1  | pT3cNX   | High grade serous carcinoma |
| 4         | 32.1  | pT3bNX   | High grade serous carcinoma |
| 5         | 24.7  | pT3cN1a  | High grade serous carcinoma |
| 6         | 37.3  | pT3aN2a  | High grade serous carcinoma |
| 7         | 20.8  | pT1bNX   | High grade serous carcinoma |
| 8         | 42.8  | pT3aN1   | Low grade serous carcinoma  |
| 9         | 34.9  | pTb1NX   | Serous borderline carcinoma |
| 10        | 31.7  | ypT3cN1b | High grade serous carcinoma |
| 11        | 23.89 | ypT3cNX  | High grade serous carcinoma |
| 12        | 16.22 | pT3cNX   | High grade serous carcinoma |
| 13        | 30.6  | pT3bNX   | High grade serous carcinoma |
| 14        | 29.84 | pT3cNX   | Low grade serous carcinoma  |
| 15        | 24.15 | pT3cNX   | Low grade serous carcinoma  |

pT: Tumor stage

pN: Metastasis

y: Previously treated

**Table S2.** Tumor characteristics of ovarian cancer cell lines in NCI-60 panel and formation of subcutaneous and intraperitoneal tumors in mice.

| Name    | Histology   | Tissue Site | p53 Status       | Sub. | Intra. |
|---------|-------------|-------------|------------------|------|--------|
| OVCAR-3 | Serous G2   | Ascites     | Mutant           | 0/4  | 1/4    |
| OVCAR-4 | Adenoca. G2 | Ascites     | WT               | 0/4  | 1/4    |
| OVCAR-5 | Adenoca. G1 | N/A         | Absent           | 4/4  | 2/4    |
| OVCAR-8 | Adenoca. G3 | N/A         | Del. (Y126-K132) | 4/4  | 2/3    |
| SKOV-3  | Serous      | Ascites     | Absent           | 4/4  | 3/4    |
| IGROV-1 | Serous G3   | Primary     | Y126C            | 4/4  | 0/3    |

The number of mice that formed subcutaneous and intraperitoneal tumors per number of mice tested are taken from Mitra *et al.* [1] and Hernandez *et al.* [2] and references therein. OVCAR-5 cell line is also reported as being gastrointestinal using gene expression compositional assignments [3]; however, NCI did not confirm this report. Abbreviations: Adeno: adenocarcinoma, Sub: subcutaneous, Intra; intraperitoneal, WT: wild type, Del: deletion, N/A: not available. In the original nomenclature, SKOV-3 and IGROV-1 cells were abbreviated as SK-OV-3 and IGR-OV1, respectively.

1. Mitra, A.K., et al., *In vivo tumor growth of high-grade serous ovarian cancer cell lines*. Gynecol Oncol, 2015. **138**(2): p. 372-7.
2. Hernandez, L., et al., *Characterization of ovarian cancer cell lines as in vivo models for preclinical studies*. Gynecol Oncol, 2016. **142**(2): p. 332-40.
